# Supplementary material
Source: PubMed Central journal article supplement (PMC2726839)
Supplement: er.2008-0031_1.pdf [file er.2008-0031_1.pdf]

## PLEASE NOTE

This Rapid Electronic Publication article is scheduled to appear in the May 2009 issue of *Endocrine Reviews*, which includes several articles that follow the style of those published in the now-discontinued series, *Recent Progress in Hormone Research*.

In keeping with the tradition of RPHR, these manuscripts are meant to highlight a sustained body of work from a particular lab, presented in the context of the overall field. They are intended to be briefer and not as extensively referenced as the usual *Endocrine Reviews* article.

For more information, please see the following editorial:

<http://edrv.endojournals.org/cgi/content/full/26/3/307>
